# Supplementary material
Source: PubMed Central journal article supplement (PMC3808592)
Supplement: 1316709110_pnas.201316709SI.pdf [file 1316709110_pnas.201316709SI.pdf]

# Supporting Information

Liu et al. 10.1073/pnas.1316709110

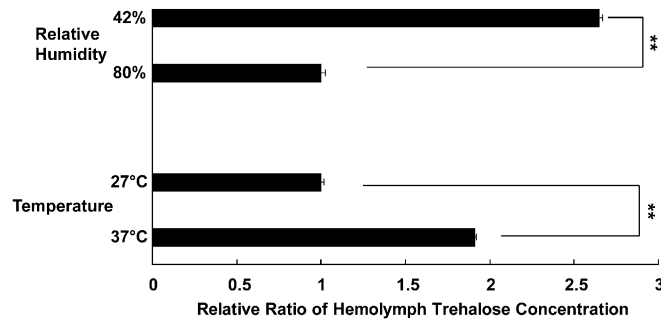

**Fig. S1.** Normalized hemolymph trehalose concentrations after stress treatments. Mosquito hemolymph was extracted after desiccation and heat for 2 d, and trehalose concentrations were measured. Using trehalose levels under control conditions (80% relative humidity and 27 °C) as references, the relative trehalose concentration in mosquitoes at 42% relative humidity is  $2.6 \pm 0.02$  times of that in control mosquitoes, and  $1.9 \pm 0.01$  times of control at 37 °C. Both are statistically significant with  $P \leq 0.01$  by Student's *t* test.

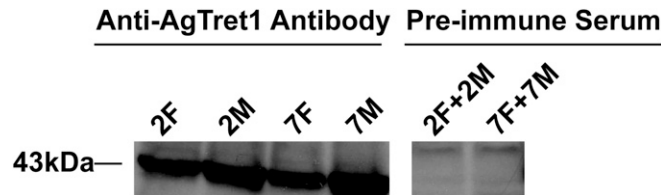

**Fig. S2.** Western blot of pooled whole adult *Anopheles gambiae* mosquitoes. (Left) Western blot using AgTret1 antibody; sample in each lane is 2F (2-d-old females), 2M (2-d-old males), 7F (7-d-old females), and 7M (7-d-old males). (Right) Western blot using preimmune serum, sample in each lane is 2F+2M (2-d-old adults including same numbers of females and males) and 7F+7M (7-d-old adults including same numbers of females and males). Sample loading is normalized with mosquito numbers.

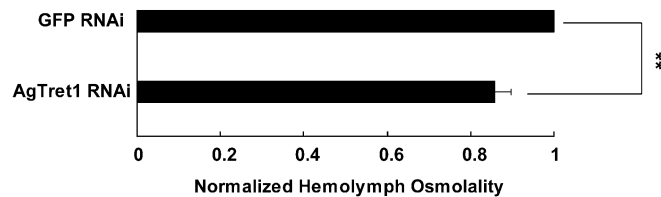

**Fig. S3.** Normalized hemolymph osmolality in RNAi mosquitoes. Using the hemolymph osmolality of GFP dsRNA-injected mosquitoes as reference, the normalized hemolymph osmolality in AgTret1-silenced mosquitoes is reduced by 14% compared with controls.  $**P \leq 0.01$  by Student's *t* test.

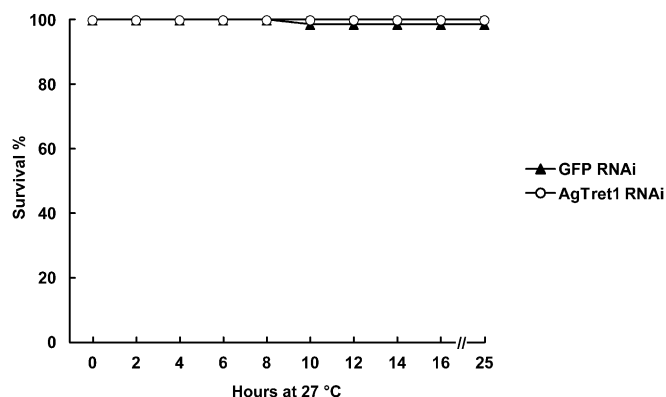

**Fig. S4.** Survival rate of dsRNA-injected mosquitoes under control condition (27 °C and 80% relative humidity). In three repeats with 22–25 mosquitoes injected with GFP- or AgTret1-dsRNA each time, the survival rate is  $98.7 \pm 2.3\%$  or  $100 \pm 0\%$ . There is no significantly different death rate at the 27 °C control condition. x axis, hours at 27 °C; y axis, mosquito survival rate in %.

**Table S1. Summary of desiccation and heat assays**

| Exp. no.                     | <i>n</i> (GFP RNAi) | <i>n</i> (AgTret1 RNAi) | <i>P</i> value of survival analysis |
|------------------------------|---------------------|-------------------------|-------------------------------------|
| <b>Antidesiccation assay</b> |                     |                         |                                     |
| 1*                           | 31                  | 38                      | $P \leq 0.05$                       |
| 2                            | 35                  | 34                      | $P \leq 0.01$                       |
| 3                            | 36                  | 34                      | $P \leq 0.05$                       |
| <b>Antiheat assay</b>        |                     |                         |                                     |
| 1*                           | 39                  | 39                      | $P \leq 0.05$                       |
| 2                            | 39                  | 25                      | $P \leq 0.01$                       |
| 3                            | 27                  | 32                      | $P \leq 0.05$                       |

Total mosquito numbers in control (GFP RNAi) or AgTret1 RNAi group and the corresponding *P* values of survival analysis in three experiments are shown. The experiments with \* are the ones chosen as the representative plots in Fig. 3 A and B.

**Table S2. Summary of oocyst-counting results**

| Exp. no. | Mean oocysts and <i>n</i> (GFP RNAi) | Mean oocysts and <i>n</i> (AgTret1 RNAi) | <i>P</i> of Mann–Whitney <i>U</i> test |
|----------|--------------------------------------|------------------------------------------|----------------------------------------|
| 1*       | Mean = 16.5, <i>n</i> = 59           | Mean = 4.6, <i>n</i> = 60                | $P \leq 0.01$                          |
| 2        | Mean = 3.0, <i>n</i> = 78            | Mean = 1.0, <i>n</i> = 71                | $P \leq 0.05$                          |
| 3        | Mean = 18.9, <i>n</i> = 43           | Mean = 7.0, <i>n</i> = 46                | $P \leq 0.05$                          |

Mean oocysts per midgut, mosquito numbers in control (GFP RNAi) or AgTret1 RNAi group, and the corresponding *P* values of nonparametric Mann–Whitney *U* test in three biological repeat experiments are shown. The experiment with \* is the one chosen as the representative plot in Fig. 4.

**Table S3. Primers used for AgTreT1 cloning, RT-qPCR, and RNAi**

|                            |                                                 |
|----------------------------|-------------------------------------------------|
| <b>For AgTreT1 Cloning</b> |                                                 |
| TreT1_F                    | ACAGAATTC CATGAAATGGGCACGAAAGAG                 |
| TreT1_R                    | TCTAGCTAGCTTACATGTTGAACGACAGC                   |
| <b>For AgTreT1 RNAi</b>    |                                                 |
| TreT1_RNAiF2b              | TAATACGACTCACTATAGGGAGAAGAAGCTGTGCACGATCATCGTCG |
| TreT1_Rb                   | TAATACGACTCACTATAGGGAGATTACATGTTGAACGACAG C     |
| EGFP-RNAi-F2               | TAATACGACTCACTATAGGGAGACTCGTGACCACCTGACCTACG    |
| EGFP-RNAi-R2               | TAATACGACTCACTATAGGGAGAGATCTTGAAGTTCACCTTGATGCC |
| <b>For AgTreT1 qPCR</b>    |                                                 |
| AgTreT1_qF                 | TTCGGTAACATCGGCATCC                             |
| AgTreT1_qR                 | CTCGGAATGAGGAACATCAG                            |
| <b>For S7 qPCR control</b> |                                                 |
| S7A                        | TCCTGGAGCTGGAGATGAAC                            |
| S7B                        | GACGGTCTGTACCTTCTGG                             |
